# Supplementary material
Source: PubMed Central journal article supplement (PMC3990914)
Supplement: supp_blood-2013-11-538173_blood-2013-11-538173-1.pdf [file supp_blood-2013-11-538173_blood-2013-11-538173-1.pdf]

Supplementary Material: Lynch et al “Control of VWF A2 domain stability....”

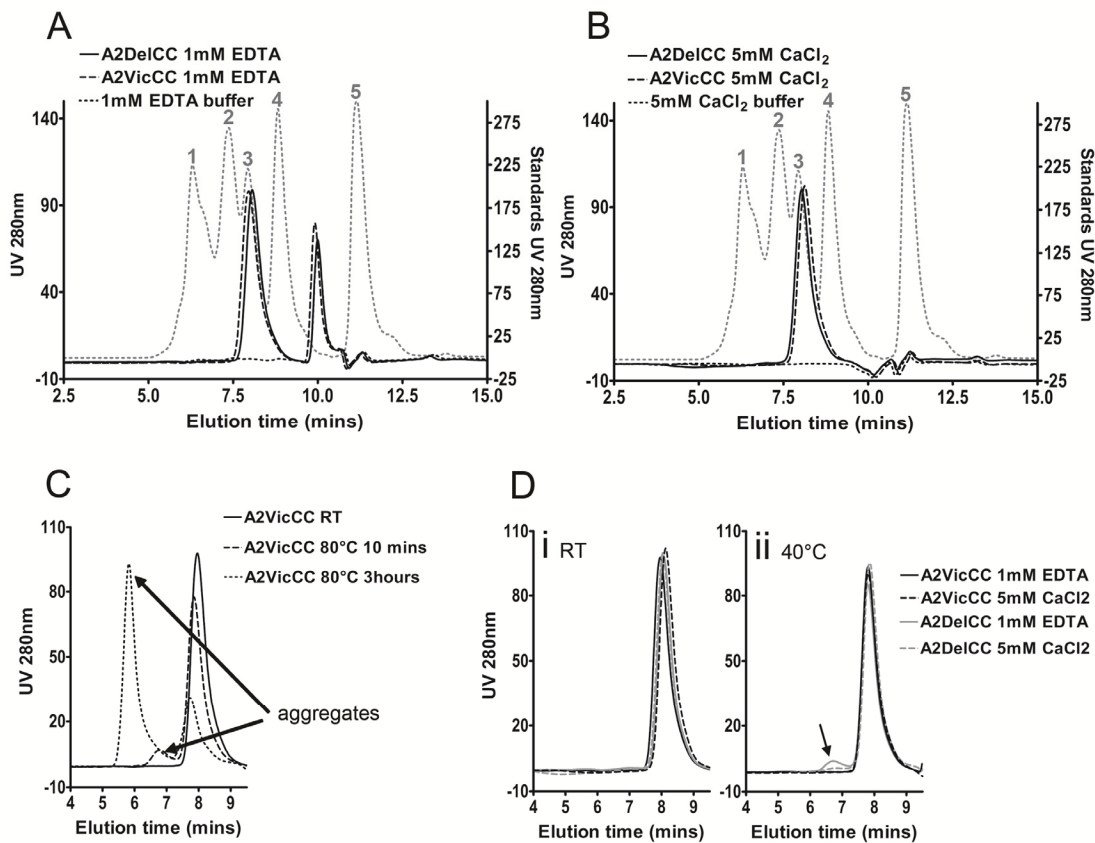

Legend to Supplementary Figure: SE-HPLC to detect temperature-induced aggregation of purified VWF A2 domain fragments

SE-HPLC was calibrated with a 10x dilution of BioRad Gel Filtration Standards, the labelled peaks (in Panels A and B) represent: 1- Thyroglobulin (MW 660kDa), 2-  $\gamma$ -globulin (MW 158 kDa), 3- Ovalbumin (44 kDa), 4- Myoglobin (MW 17kDa) and 5- Vitamin B<sub>12</sub> (MW 1.35 kDa). 50 $\mu$ L of 0.5mg/ml purified VWF A2 domains, A2 $\Delta$ CC and A2VicCC, were loaded in the presence of (A) 1mM EDTA (were a distinct peak is observed at 10mins which is likely to be EDTA in complex with trace cations, as also present when buffer without protein was loaded) and (B) 5mM CaCl<sub>2</sub>. (C) Induced aggregation of A2VicCC was performed by heating 60 $\mu$ L of 0.5mg/ml of purified VWF A2 at 80°C for 10mins and for 3hours, in a PCR machine just prior to loading onto the SE-HPLC column. (D) 1mM EDTA and 5mM CaCl<sub>2</sub> were added to 0.5mg/ml VWF A2 $\Delta$ CC and A2VicCC and after incubation at room temperature (RT) 50 $\mu$ L was loaded on the column. Monomeric peaks were observed for both protein constructs in both conditions (D-i). After incubation at 40°C for 10mins, a small yet distinct aggregation peak was observed (arrowed) for A2 $\Delta$ CC in 1mM EDTA (D-ii).
